# Supplementary material
Source: HighWire-hosted journal article supplement (https://bibliotheek.ehb.be/content/78/11/818)
Supplement: inline-supplementary-material-1 [file inline-supplementary-material-1.pdf]

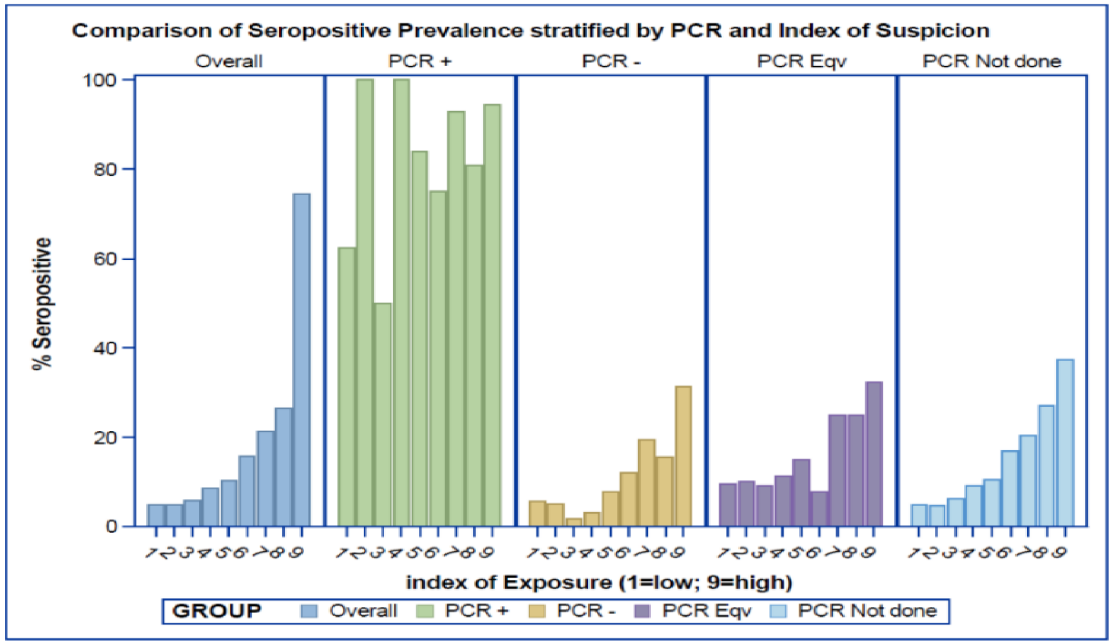

**Figure S1.** Baseline distribution of (Spring 2020, N=40329) Index of suspicion of exposure to SARS-CoV-2 (Do you believe you were infected with COVID-19? 1=low – 9=high) by PCR (reverse transcription polymerase chain reaction) PCR+ = PCR positive (n=2186); PCR- = PCR negative (n=3892); PCR Eqv = PCR equivocal (n=263)
